# Supplementary material for: Who Are the Most Influential Emergency Physicians on Twitter?
Source: PubMed Central journal article supplement (PMC5305138; doi:10.5811/westjem.2016.11.31299), 2017-01-19
Supplement: wjem-18-281-s001.pdf [file wjem-18-281-s001.pdf]

Appendix A: Most influential Twitter users ranked by different metrics of influence

| In Degree       |      | Betweenness     |        | Eigenvector     |         |
|-----------------|------|-----------------|--------|-----------------|---------|
| emcrit          | 1534 | emnews          | 509924 | emcrit          | 0.00401 |
| amalmattu       | 1389 | emcrit          | 411571 | amalmattu       | 0.00374 |
| melherbert      | 1292 | melherbert      | 290817 | m_lin           | 0.00369 |
| m_lin           | 1228 | amalmattu       | 288826 | melherbert      | 0.00360 |
| emnews          | 1219 | m_lin           | 180953 | em_educator     | 0.00354 |
| em_educator     | 1046 | emmanchester    | 110094 | precordialthump | 0.00341 |
| criticalcarenow | 1014 | rainedoc        | 108230 | criticalcarenow | 0.00339 |
| emswami         | 1009 | salahalem       | 107890 | emswami         | 0.00339 |
| emergencypdx    | 994  | sandnsurf       | 105388 | joelex5         | 0.00330 |
| precordialthump | 967  | emswami         | 97109  | emnews          | 0.00328 |
| sandnsurf       | 936  | em_educator     | 93804  | emergencypdx    | 0.00328 |
| cliffreid       | 920  | mdaware         | 90376  | mdaware         | 0.00327 |
| ultrasoundpod   | 915  | criticalcarenow | 87338  | cliffreid       | 0.00326 |
| joelex5         | 907  | emergencypdx    | 86734  | emmanchester    | 0.00324 |
| pharmertoxguy   | 873  | andyneill       | 79747  | sandnsurf       | 0.00322 |
| srrezaie        | 842  | precordialthump | 74465  | ultrasoundpod   | 0.00321 |
| mdaware         | 834  | cliffreid       | 73452  | embasic         | 0.00312 |
| emmanchester    | 829  | drangeloer      | 71180  | pharmertoxguy   | 0.00309 |
| embasic         | 826  | joelex5         | 70877  | emlitofnote     | 0.00306 |
| emlitofnote     | 803  | ultrasoundpod   | 66899  | srrezaie        | 0.00305 |
| ketaminh        | 768  | srrezaie        | 62100  | ketaminh        | 0.00299 |
| airwaycam       | 746  | pharmertoxguy   | 61128  | emeducation     | 0.00299 |
| emupdates       | 735  | embasic         | 55567  | andyneill       | 0.00291 |
| smithecgblog    | 716  | ketaminh        | 45736  | emimdoc         | 0.00285 |
| poisonreview    | 650  | rcempresident   | 45708  | umanamd         | 0.00282 |
| emeducation     | 642  | airwaycam       | 41662  | lwestafer       | 0.00281 |
| andyneill       | 635  | emlitofnote     | 40651  | emupdates       | 0.00281 |
| klinelab        | 632  | emupdates       | 39615  | jeremyfaust     | 0.00280 |
| lwestafer       | 628  | smithecgblog    | 38699  | poisonreview    | 0.00276 |
| jeremyfaust     | 617  | followbackdoc   | 37833  | airwaycam       | 0.00275 |
| _nmay           | 599  | emeducation     | 35904  | smithecgblog    | 0.00270 |
| eleytherius     | 573  | klinelab        | 30411  | _nmay           | 0.00270 |
| brent_thoma     | 561  | poisonreview    | 29659  | rainedoc        | 0.00265 |
| emimdoc         | 546  | umanamd         | 29196  | brent_thoma     | 0.00264 |
| broomedocs      | 526  | gruntdoc        | 28555  | eleytherius     | 0.00259 |
| socraticem      | 513  | 4hremgencydo    |        | broomedocs      | 0.00252 |
| grahamwalker    | 511  | c               | 27973  | klinelab        | 0.00248 |
| pemedpodcast    | 510  | jeremyfaust     | 24661  | bobstuntz       | 0.00247 |

|                     |     |                 |       |                 |         |
|---------------------|-----|-----------------|-------|-----------------|---------|
| umanamd             | 508 | _nmay           | 24332 | tchanmd         | 0.00236 |
| 4hremergencydoc     | 503 | emimdoc         | 23912 | 4hremergencydoc | 0.00231 |
| bobstuntz           | 496 | eleytherius     | 23498 | ercowboy        | 0.00231 |
| gruntdoc            | 494 | lwestafer       | 22696 | rogerrdharris   | 0.00231 |
| rogerrdharris       | 484 | adrianclark1    | 22302 | grahamwalker    | 0.00229 |
| drhowiemell         | 476 | beckybp         | 20303 | socraticem      | 0.00228 |
| tchanmd             | 468 | brent_thoma     | 20050 | painfreed       | 0.00225 |
| pedemmorsels        | 442 | aysabbagh       | 19919 | pemedpodcast    | 0.00223 |
| nickgenes           | 440 | drjessepines    | 18935 | gruntdoc        | 0.00222 |
| richardbody         | 430 | nickgenes       | 18679 | movinmeat       | 0.00217 |
| rainedoc            | 423 | emergidoc       | 18549 | pedemmorsels    | 0.00216 |
| rcempresident       | 399 | drhowiemell     | 17988 | cabreraerdr     | 0.00215 |
| emchatter           | 394 | tchanmd         | 17615 | takeokun        | 0.00214 |
| movinmeat           | 375 | grahamwalker    | 16341 | richardbody     | 0.00214 |
| emdocbrett          | 374 | sithlord2004    | 15712 | nickgenes       | 0.00204 |
| painfreed           | 374 | bobstuntz       | 15444 | drhowiemell     | 0.00204 |
| johngreenwoodm<br>d | 372 | kipschumacher   | 15341 | jvrntz          | 0.00200 |
| takeokun            | 370 | pemedpodcast    | 15319 | rcempresident   | 0.00200 |
| cabreraerdr         | 366 | thetechdoc      | 14932 | emdocbrett      | 0.00200 |
| sonospot            | 364 | takeokun        | 14735 | sonospot        | 0.00198 |
| edexam              | 362 | nightshiftmd    | 14374 | emchatter       | 0.00193 |
| emergidoc           | 362 | ivorkovic       | 14256 | nickjohnsonmd   | 0.00193 |
| drjessepines        | 356 | socraticem      | 14092 | docnikko        | 0.00192 |
| ercowboy            | 349 | cabreraerdr     | 13350 | johngreenwoodmd | 0.00192 |
| humanfact0rz        | 341 | broomedocs      | 12619 | er_doc          | 0.00191 |
| em_resus            | 339 | insignaresemdoc | 12303 | chrispartyka    | 0.00191 |
| docbond007          | 335 | pedemmorsels    | 12103 | socalexmd       | 0.00191 |
| jvrntz              | 328 | trainthetrainer | 12084 | edexam          | 0.00191 |
| docib               | 326 | ercowboy        | 11931 | sluckettg       | 0.00189 |
| emnerd_             | 321 | docnikko        | 11742 | robjbryant13    | 0.00188 |
| emcardiac           | 311 | edwinleap       | 11690 | ebmgonewild     | 0.00185 |
| fltdoc1             | 307 | rogerrdharris   | 11590 | emtogether      | 0.00185 |
| choo_ek             | 304 | painfreed       | 11504 | emnerd_         | 0.00184 |
| robjbryant13        | 299 | movinmeat       | 11276 | global_em       | 0.00183 |
| meganranney         | 295 | frontlinedoc    | 10836 | humanfact0rz    | 0.00182 |
| emtogether          | 294 | richardbody     | 10758 | emcardiac       | 0.00182 |
| thetechdoc          | 294 | istanbulemdoc   | 10509 | salahalem       | 0.00181 |
| emo_daddy           | 287 | pommalada       | 9804  | myemergencymed  | 0.00181 |
| themattmak          | 281 | xrawanx         | 9793  | mfbellolio      | 0.00181 |
| dreapadoirtas       | 280 | areddymd        | 9743  | themattmak      | 0.00181 |
| er_doc              | 276 | jord7an         | 9719  | dreapadoirtas   | 0.00180 |
| damian_roland       | 275 | er_doc          | 9271  | jcbeausoleilmd  | 0.00177 |

|              |     |                |      |                 |         |
|--------------|-----|----------------|------|-----------------|---------|
| tessardavis  | 269 | epointoledo    | 9259 | docib           | 0.00175 |
| sherbino     | 265 | sjdmd          | 9154 | docbond007      | 0.00173 |
| hawkmoonhems | 262 | meganranney    | 9019 | drsamko         | 0.00173 |
| sithlord2004 | 259 | emchatter      | 8945 | drfrankgabrin   | 0.00173 |
| jojohaber    | 258 | em_pearls      | 8716 | jojohaber       | 0.00173 |
| ebmgonewild  | 253 | choo_ek        | 8687 | drmehmettati    | 0.00173 |
| emjclub      | 253 | patima         | 8584 | emergidoc       | 0.00172 |
| chrispartyka | 247 | adamcorley     | 8361 | jploughrey      | 0.00171 |
| annaemin5    | 243 | themattmak     | 7728 | kestlermd       | 0.00170 |
| drwinters    | 240 | em_resus       | 7709 | annaemin5       | 0.00168 |
| drsamko      | 240 | beren85        | 7663 | shannonomac     | 0.00168 |
| ermentor     | 239 | teresawumd     | 7632 | bodymender_n_ed | 0.00166 |
| realeddoc    | 236 | nickjohnsonmd  | 7509 | annecreaton     | 0.00166 |
| drjfrank     | 231 | global_em      | 7189 | petrosniak      | 0.00163 |
| ultrasoundmd | 229 | spoedman       | 7187 | beren85         | 0.00163 |
| ergoddessmd  | 228 | pepebravoc     | 7114 | drjessepines    | 0.00162 |
| poppaspearls | 226 | patarchambault | 7060 | pommalada       | 0.00162 |
| kestlermd    | 222 | bhanders       | 7003 | meganranney     | 0.00162 |
| areddynd     | 219 | sonospot       | 6933 | istanbulemdoc   | 0.00160 |
| resusreview  | 217 | emdobrett      | 6518 | bhanders        | 0.00160 |
|              |     | docbond007     | 6429 |                 |         |
